# Supplementary material for: Application of neon as a collision gas – a cell gas index for collision/reaction cell-ICP-MS determination
Source: Royal Society of Chemistry journal article supplement (doi:10.1039/d0ja00176g), 2020-01-01
Supplement: d0ja00176g1.pdf [file d0ja00176g1.pdf]

## Supplementary Information

Supplemental data S1 Cell gas indices.

| Cell gas                      | He         | H <sub>2</sub> | Ne         | Ar         | O <sub>2</sub> | N <sub>2</sub> | Kr         | Xe         |
|-------------------------------|------------|----------------|------------|------------|----------------|----------------|------------|------------|
| Normalized value of $\lambda$ | 1.00       | 1.59           | 1.40       | 2.77       | 2.73           | 2.96           | 3.60       | 4.94       |
| $\alpha$ (eV)                 | 24.59 (IP) | 4.52 (BE)      | 21.56 (IP) | 15.76 (IP) | 5.16 (BE)      | 9.79 (BE)      | 14.00 (IP) | 12.13 (IP) |
| H                             | -46.3      | -6.0           | -235.9     | -251.7     | -16.2          | -531.9         | -127.3     | 1002.3     |
| He                            | 0.0        | 37.0           | 13.2       | 151.4      | 1212.4         | -21.6          | 494.9      | 1252.2     |
| Li                            | -37.0      | -6.8           | -219.2     | -552.6     | -309.1         | -470.5         | -1250.0    | -2104.3    |
| Be                            | -15.2      | -22.5          | -85.7      | -177.2     | -27.9          | -600.1         | -350.8     | -452.8     |
| B                             | -10.5      | -20.9          | -60.1      | -133.0     | -388.5         | -497.8         | -277.0     | -400.3     |
| C                             | -6.0       | -13.1          | -32.4      | -55.6      | -239.9         | -281.5         | -92.2      | -63.0      |
| N                             | -3.2       | -6.5           | -15.8      | -10.9      | 44.7           | -7.8           | 12.9       | 124.7      |
| O                             | -2.6       | 0.2            | -13.4      | -14.2      | 8.4            | 5.9            | -6.9       | 58.0       |
| F                             | -1.3       | 0.5            | -5.2       | 8.1        | 48.8           | 47.2           | 45.7       | 151.9      |
| Ne                            | -0.5       | 0.5            | 0.0        | 24.2       | 38.6           | -6.1           | 86.0       | 230.6      |
| Na                            | -12.9      | -4.3           | -76.5      | -194.4     | -19.9          | -14.2          | -442.0     | -749.9     |
| Mg                            | -8.1       | -1.2           | -46.8      | -107.2     | 26.9           | 21.0           | -228.7     | -347.1     |
| Al                            | -6.5       | -1.0           | -38.4      | -94.7      | -34.4          | 16.9           | -211.5     | -348.8     |
| Si                            | -5.2       | -0.3           | -29.9      | -66.6      | -4.6           | 30.6           | -139.5     | -204.0     |
| P                             | -3.6       | -0.2           | -19.7      | -37.0      | 14.1           | -28.6          | -67.1      | -67.5      |
| S                             | -3.1       | 1.2            | -17.3      | -32.8      | 39.3           | 2.5            | -60.3      | -63.0      |
| Cl                            | -2.1       | 0.9            | -10.8      | -13.8      | 27.9           | -10.5          | -13.9      | 24.2       |

|    |       |      |       |        |        |        |        |        |
|----|-------|------|-------|--------|--------|--------|--------|--------|
| Ar | -1.3  | 0.2  | -5.8  | 0.0    | -8.5   | -18.1  | 18.9   | 83.7   |
| K  | -10.1 | -6.5 | -60.3 | -157.2 | -188.2 | -331.6 | -362.3 | -628.3 |
| Ca | -7.2  | -0.7 | -42.1 | -103.4 | -125.8 | -256.7 | -230.4 | -378.0 |
| Sc | -5.9  | -1.9 | -34.6 | -83.4  | -70.4  | -196.8 | -183.7 | -295.8 |
| Ti | -5.2  | -0.4 | -30.5 | -72.7  | 10.7   | -161.7 | -159.1 | -253.0 |
| V  | -4.8  | 0.1  | -28.0 | -67.0  | -16.1  | -139.6 | -147.0 | -234.6 |
| Cr | -4.6  | -0.5 | -26.6 | -63.6  | -7.4   | -130.3 | -139.4 | -222.2 |
| Mn | -4.0  | -0.5 | -23.3 | -54.0  | -13.8  | -117.1 | -116.1 | -178.6 |
| Fe | -3.7  | 1.0  | -21.5 | -48.6  | 7.3    | -101.8 | -102.8 | -153.3 |
| Co | -3.4  | -0.4 | -19.9 | -45.0  | -8.8   | -93.2  | -95.3  | -142.2 |
| Ni | -3.4  | -0.3 | -19.9 | -45.7  | -9.6   | -97.6  | -97.5  | -148.0 |
| Cu | -3.1  | -0.4 | -17.8 | -40.6  | -12.6  | -106.9 | -86.4  | -130.4 |
| Zn | -2.6  | -0.3 | -14.9 | -30.6  | -69.3  | -118.7 | -60.4  | -77.1  |
| Ga | -2.9  | 3.7  | -17.1 | -42.2  | 96.5   | 59.4   | -94.2  | -155.2 |
| Ge | -2.3  | 4.2  | -13.2 | -30.0  | 114.3  | 96.5   | -63.4  | -94.5  |
| As | -1.8  | -0.1 | -10.1 | -20.1  | 2.8    | -16.2  | -38.7  | -46.2  |
| Se | -1.5  | -0.2 | -8.7  | -17.4  | -2.8   | 47.3   | -33.4  | -40.3  |
| Br | -1.2  | 5.7  | -6.5  | -10.3  | 163.8  | 196.1  | -15.5  | -4.8   |
| Kr | -0.9  | 5.1  | -4.5  | -4.1   | 149.5  | 197.6  | 0.0    | 25.5   |
| Rb | -5.1  |      | -30.4 | -79.6  |        |        | -183.8 | -320.1 |
| Sr | -3.8  |      | -22.3 | -55.7  |        |        | -125.3 | -208.8 |

## JAAS

## ARTICLE

|    |      |       |       |        |        |        |
|----|------|-------|-------|--------|--------|--------|
| Y  | -3.5 | -20.6 | -50.4 | 475.5* | -112.0 | -183.0 |
| Zr | -3.2 | -19.0 | -45.7 | 530.7* | -100.4 | -161.1 |
| Nb | -3.0 | -17.8 | -42.5 |        | -93.1  | -148.6 |
| Mo | -2.8 | -16.1 | -38.0 |        | -82.5  | -129.5 |
| Tc | -2.6 | -14.9 | -34.7 |        | -75.0  | -116.4 |
| Ru | -2.4 | -14.1 | -32.8 |        | -70.5  | -109.0 |
| Rh | -2.3 | -13.4 | -30.9 | 788.6* | -66.4  | -101.9 |
| Pd | -2.1 | -11.8 | -26.1 |        | -54.3  | -78.2  |
| Ag | -2.1 | -12.0 | -27.7 |        | -59.3  | -90.4  |
| Cd | -1.8 | -10.1 | -21.5 |        | -43.3  | -58.3  |
| In | -2.0 | -12.1 | -30.0 | 995.9* | -67.4  | -111.9 |
| Sn | -1.7 | -9.8  | -22.8 |        | -49.1  | -75.9  |
| Sb | -1.4 | -8.0  | -17.3 |        | -35.5  | -49.9  |
| Te | -1.2 | -6.8  | -14.4 |        | -29.0  | -39.0  |
| I  | -1.0 | -5.7  | -10.7 |        | -19.4  | -19.7  |
| Xe | -0.8 | -4.4  | -6.6  |        | -9.3   | 0.0    |
| Cs | -3.7 | -22.3 | -58.9 |        | -136.8 | -239.7 |
| Ba | -2.9 | -17.0 | -43.1 |        | -97.7  | -165.5 |
| La | -2.1 | -12.6 | -31.7 |        | -71.4  | -119.4 |
| Ce | -2.0 | -11.9 | -29.9 |        | -67.4  | -113.0 |
| Pr | -2.7 | -15.9 | -39.9 |        | -90.2  | -151.5 |

|    |      |       |       |       |        |
|----|------|-------|-------|-------|--------|
| Nd | -2.2 | -12.9 | -32.4 | -73.1 | -122.5 |
| Pm | -2.2 | -12.7 | -31.9 | -71.8 | -120.2 |
| Sm | -2.4 | -14.2 | -35.5 | -79.8 | -133.2 |
| Eu | -2.3 | -13.6 | -33.9 | -76.3 | -127.2 |
| Gd | -2.2 | -12.9 | -31.5 | -70.2 | -115.0 |
| Tb | -2.1 | -12.5 | -31.0 | -69.5 | -115.2 |
| Dy | -2.1 | -12.3 | -30.5 | -68.3 | -112.7 |
| Ho | -2.0 | -12.0 | -29.6 | -66.0 | -108.7 |
| Er | -2.0 | -11.8 | -28.9 | -64.3 | -105.6 |
| Tm | -1.9 | -11.4 | -27.9 | -62.0 | -101.4 |
| Yb | -1.9 | -11.1 | -27.0 | -60.0 | -97.8  |
| Lu | -1.9 | -11.3 | -28.4 | -64.2 | -107.9 |
| Hf | -1.7 | -9.7  | -23.1 | -50.5 | -80.2  |
| Ta | -1.5 | -8.7  | -20.1 | -43.0 | -65.7  |
| W  | -1.4 | -8.1  | -18.4 | -38.9 | -58.1  |
| Re | -1.4 | -7.8  | -17.7 | -37.6 | -56.3  |
| Os | -1.3 | -7.2  | -15.8 | -32.6 | -46.6  |
| Ir | -1.2 | -6.6  | -14.1 | -28.4 | -38.4  |
| Pt | -1.1 | -6.4  | -13.7 | -27.6 | -37.3  |
| Au | -1.1 | -6.1  | -12.8 | -25.5 | -33.3  |
| Hg | -1.0 | -5.3  | -10.1 | -18.3 | -18.7  |

## JAAS

## ARTICLE

|    |      |       |       |       |        |
|----|------|-------|-------|-------|--------|
| Tl | -1.1 | -6.6  | -16.3 | -36.4 | -59.7  |
| Pb | -1.0 | -5.9  | -13.7 | -29.5 | -45.5  |
| Bi | -0.9 | -5.5  | -12.8 | -27.7 | -43.0  |
| Po | -0.8 | -4.8  | -10.5 | -21.7 | -31.0  |
| At | -0.7 | -4.2  | -8.8  | -17.4 | -22.8  |
| Rn | -0.6 | -3.3  | -6.0  | -10.6 | -9.7   |
| Fr | -1.9 | -11.5 | -30.2 | -69.9 | -121.9 |
| Ra | -1.5 | -9.0  | -22.7 | -51.5 | -87.0  |
| Ac | -1.3 | -7.9  | -20.2 | -45.8 | -77.6  |
| Th | -1.1 | -6.7  | -16.2 | -36.0 | -58.6  |
| Pa | -1.2 | -6.9  | -17.0 | -38.1 | -63.1  |
| U  | -1.1 | -6.4  | -15.6 | -34.6 | -56.7  |
| Np | -1.1 | -6.4  | -15.5 | -34.5 | -56.2  |
| Pu | -1.1 | -6.4  | -15.8 | -35.2 | -58.0  |
| Am | -1.1 | -6.3  | -15.6 | -34.9 | -57.5  |
| Cm | -1.0 | -6.2  | -15.2 | -34.0 | -56.1  |

---

IP: 1st ionization potential (eV), BE: Bond energy (eV)

\* Ref 8: Another calculation model, which is less precise than the DFT, was used.
